# Supplementary material for: The effect of grain size on the hydration of BaZr0.9Y0.1O3−δproton conductor studied by ambient pressure X-ray photoelectron spectroscopy
Source: Royal Society of Chemistry journal article supplement (doi:10.1039/c9cp04335g), 2019-12-03
Supplement: c9cp04335g1.pdf [file c9cp04335g1.pdf]

Electronic Supplementary Information (ESI)

**The effect of grain size on the hydration of  $\text{BaZr}_{0.9}\text{Y}_{0.1}\text{O}_{3-\delta}$  proton conductor studied by  
ambient pressure X-ray photoelectron spectroscopy**

Angelique Jarry<sup>1,2,\*</sup>, Gregory S. Jackson<sup>3</sup>, Ethan J. Crumlin<sup>4</sup>, Bryan Eichhorn<sup>2</sup>, Sandrine Ricote<sup>3,\*</sup>

1 Materials Science and Engineering, University of Maryland, College Park, MD 20742, USA

2 Chemistry and Biochemistry University of Maryland, College Park, MD 20742, USA

3 Department of Mechanical Engineering, Colorado School of Mines, Golden, CO 80401, USA

4 Advanced Light Source, Lawrence Berkeley National Laboratories, Berkeley, CA 94720, USA

Corresponding author: [ajarry@umd.edu](mailto:ajarry@umd.edu); [sricote@mines.edu](mailto:sricote@mines.edu)

**Table S1:** List of the precursors used for the synthesis of the SPS, SSR and HT samples.

|                  | SPS                                                   | SSR                                                   | HT                               |
|------------------|-------------------------------------------------------|-------------------------------------------------------|----------------------------------|
| Barium carbonate | Aldrich, 99+ %                                        | Aldrich, 99+ %                                        | Fluka, purity: 99%               |
| Zirconium oxide  | Aldrich submicron powder: 99.5 %, 5.3 wt. % of yttria | Aldrich submicron powder: 99.5 %, 5.3 wt. % of yttria | Tosoh, purity: 99.9%             |
| Yttrium oxide    | Sigma-Aldrich, 99.99 %                                | Sigma-Aldrich, 99.99 %                                | Stanford Materials, purity:99.9% |

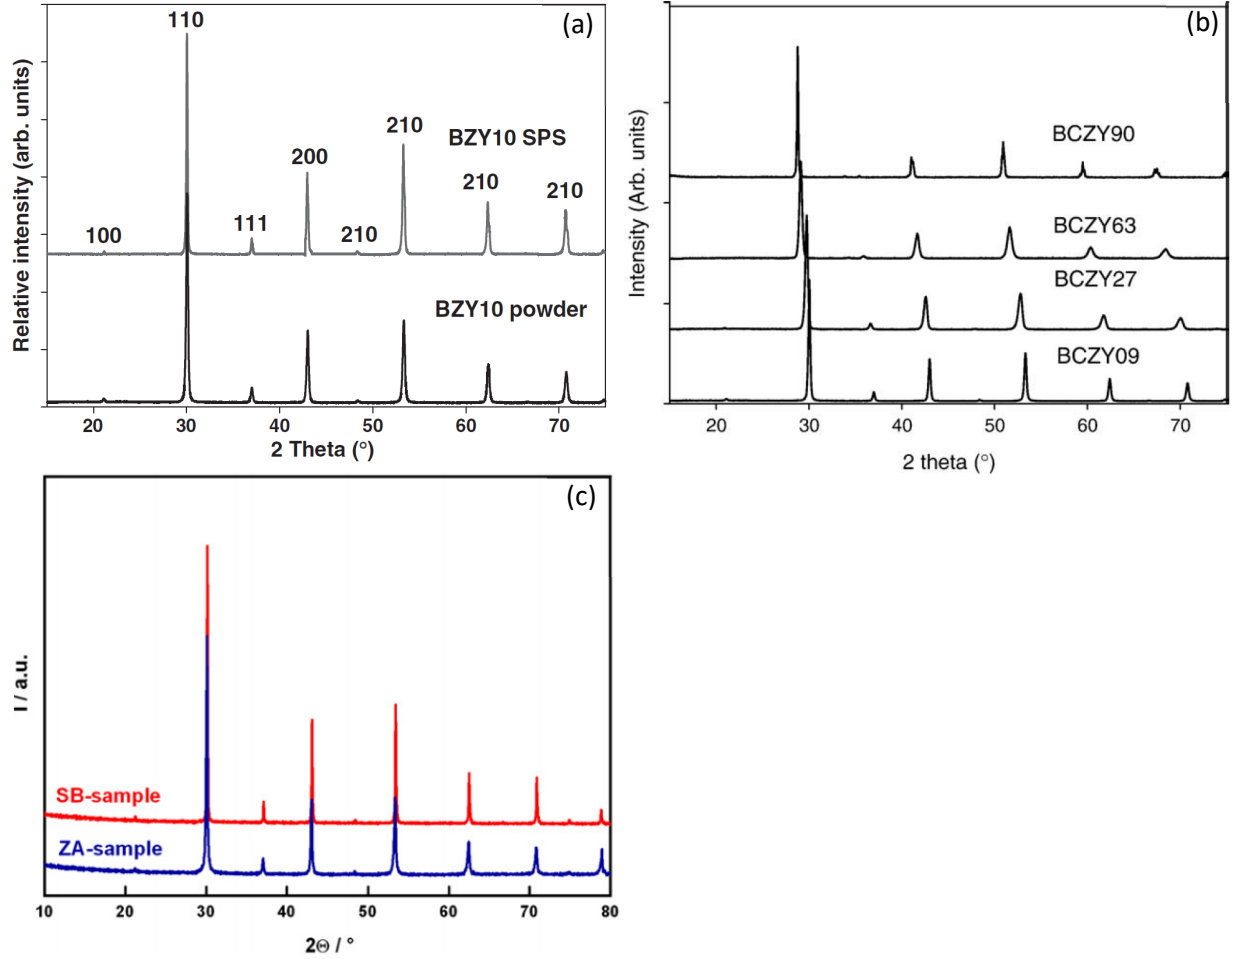

**Figure S1:** X-Ray diffraction patterns of the SPS (a), SSR labeled BCZY09 (b) and HT labeled ZA (c) samples. Reproduced from [41], [7] and [42] respectively, by permission of Elsevier LDT.

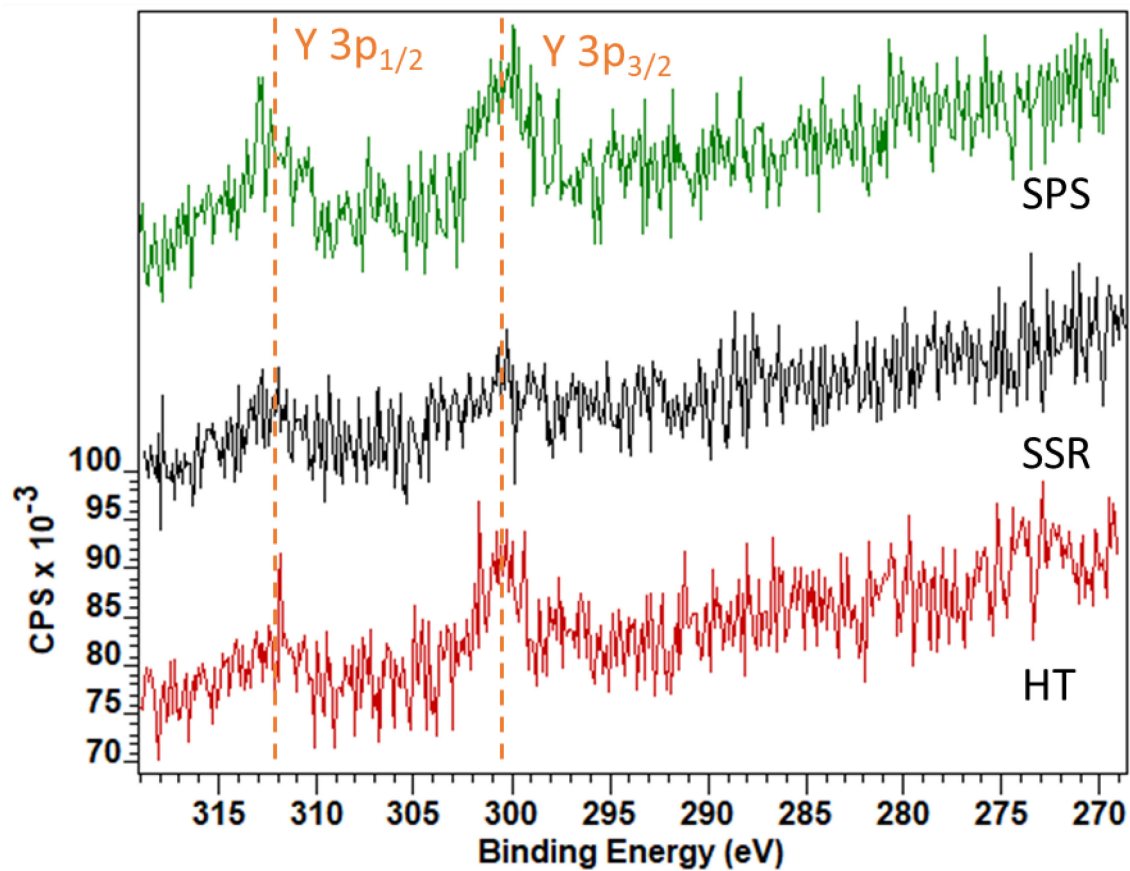

**Figure S2:** C 1s APXPS spectra of the three BaZr<sub>0.9</sub>Y<sub>0.1</sub>O<sub>3-δ</sub> pellets collected with incident X-ray energy PE= 710 eV at 500 °C at a p(O<sub>2</sub>) of 100 mTorr. No formation of carbonate was observed.

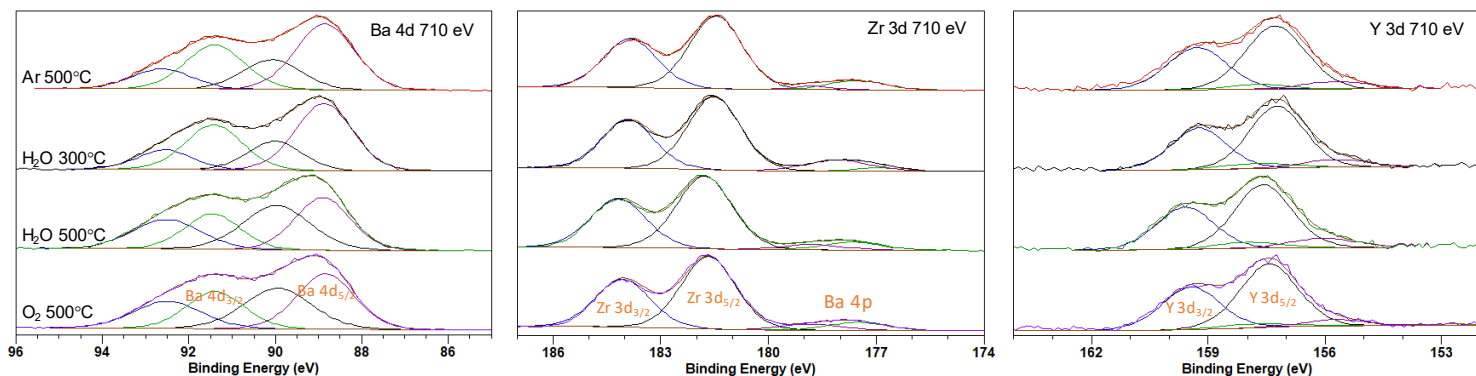

**Figure S3:** Ba 4d, Zr 3d and Y 3d in situ APXPS spectra of the  $\text{BaZr}_{0.9}\text{Y}_{0.1}\text{O}_{3-\delta}$  pellet obtained by spark plasma sintering (SPS) collected with incident X-ray energy of 710 eV as a function of environment (100 mTorr of Ar,  $\text{H}_2\text{O}$  or  $\text{O}_2$ ) and temperature (500 °C and 300 °C).

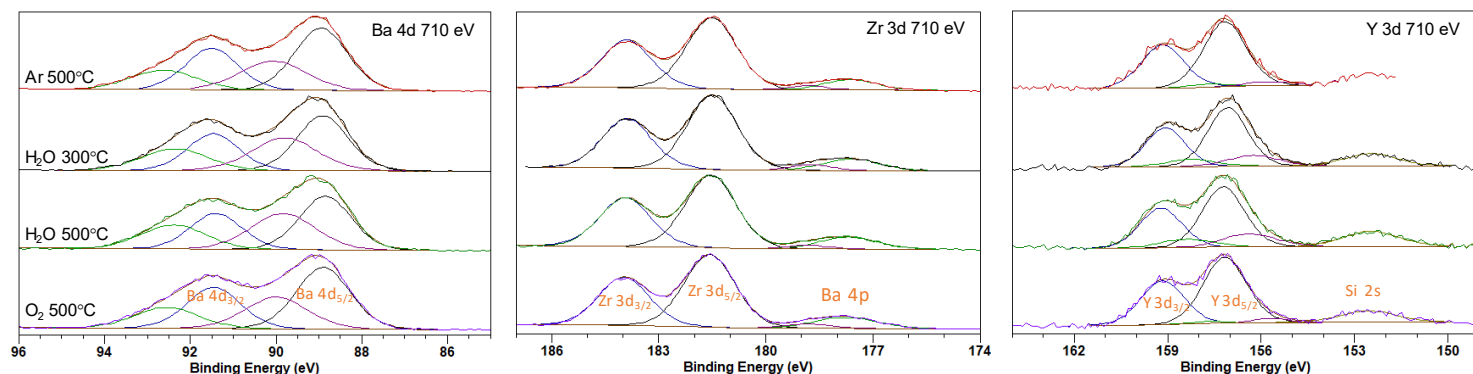

**Figure S4:** Ba 4d, Zr 3d and Y 3d in situ APXPS spectra of the  $\text{BaZr}_{0.9}\text{Y}_{0.1}\text{O}_{3-\delta}$  pellet obtained by solid state reaction (SSR) collected with incident X-ray energy of 710 eV as a function of environment (100 mTorr of Ar,  $\text{H}_2\text{O}$  or  $\text{O}_2$ ) and temperature (500 °C and 300 °C).

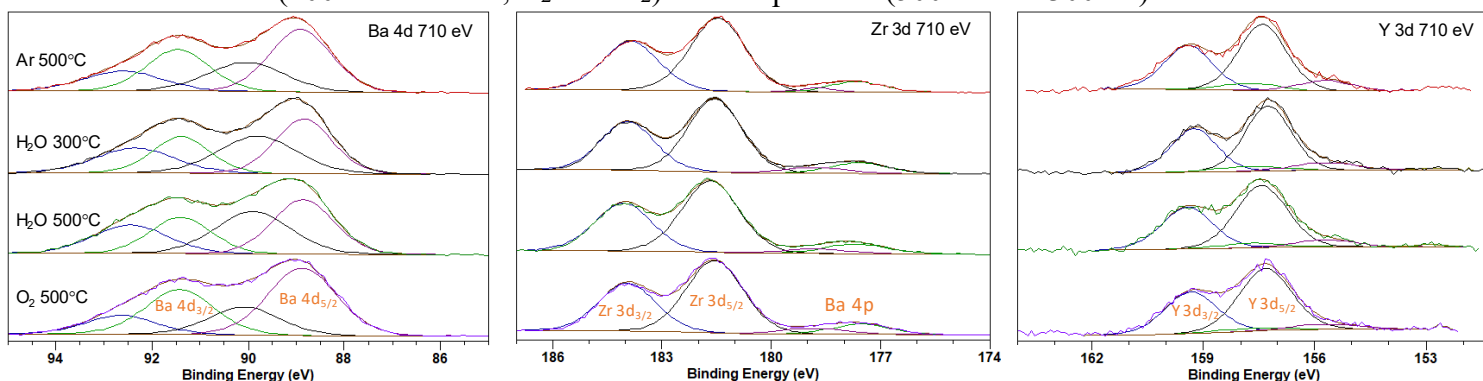

**Figure S5:** Ba 4d, Zr 3d and Y 3d in situ APXPS spectra of the  $\text{BaZr}_{0.9}\text{Y}_{0.1}\text{O}_{3-\delta}$  pellet obtained by high temperature annealing (HT) collected with incident X-ray energy of 710 eV as a function of environment (100 mTorr of Ar,  $\text{H}_2\text{O}$  or  $\text{O}_2$ ) and temperature (500 °C and 300 °C).

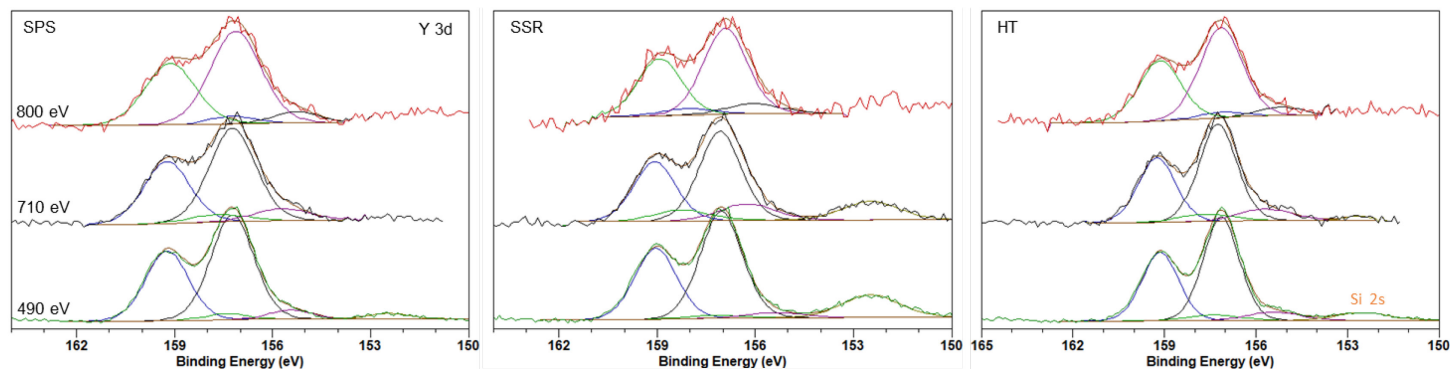

**Figure S6:** Y 3d *in situ* APXPS spectra of the  $\text{BaZr}_{0.9}\text{Y}_{0.1}\text{O}_{3-\delta}$  (a) SPS, (b) SSR and (c) HT pellets as a function of the incident X-ray energy (800 eV, 710 eV, 490 eV) at 300 °C at a  $p(\text{H}_2\text{O})$  of 100 mTorr. The collection at three different photon energies provides information from the surface to higher depth into the pellets (20, 18 and 12 Å respectively) according to the IMFP calculation for Y 3d.
